# Supplementary material for: Using Summary Statistics to Model Multiplicative Combinations of Initially Analyzed Phenotypes With a Flexible Choice of Covariates
Source: PubMed Central journal article supplement (PMC8546319; doi:10.3389/fgene.2021.745901), 2021-10-12
Supplement: DataSheet1.pdf [file DataSheet1.pdf]

# Supplementary Material for “Using summary statistics to model multiplicative combinations of initially analyzed phenotypes with a flexible choice of covariates”

## 1 FIGURES

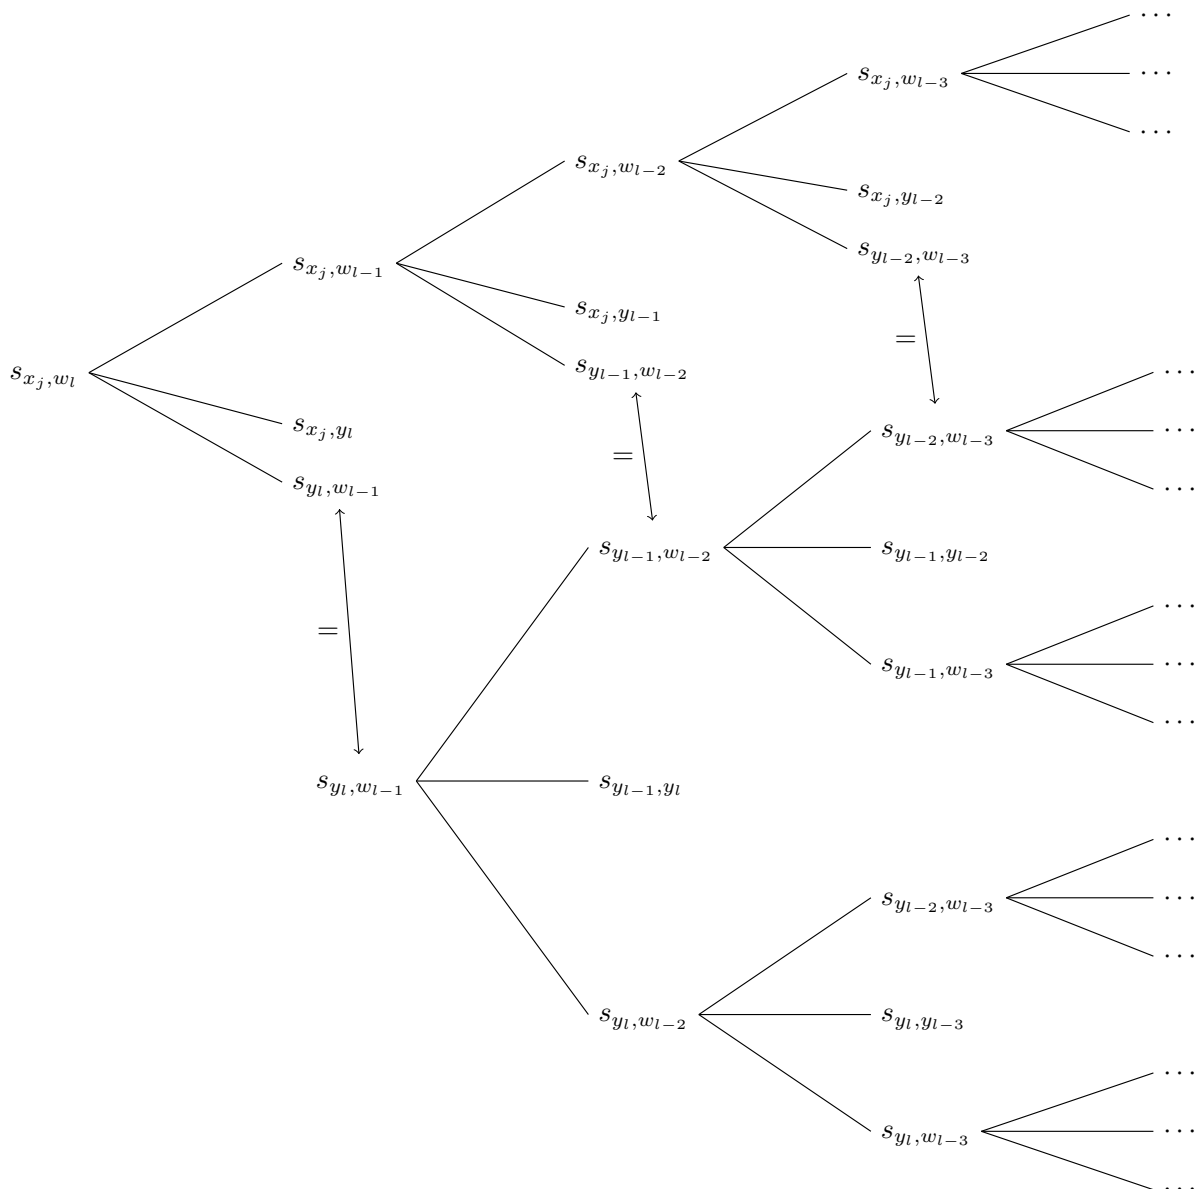

**Figure S1.** Diagram of the recursive algorithms used to approximate  $s_{x_j, w_l}$ . Three covariances are input (along with related means and variances) to approximate their parent node (to the left) using the method established in Section 2.3.1.

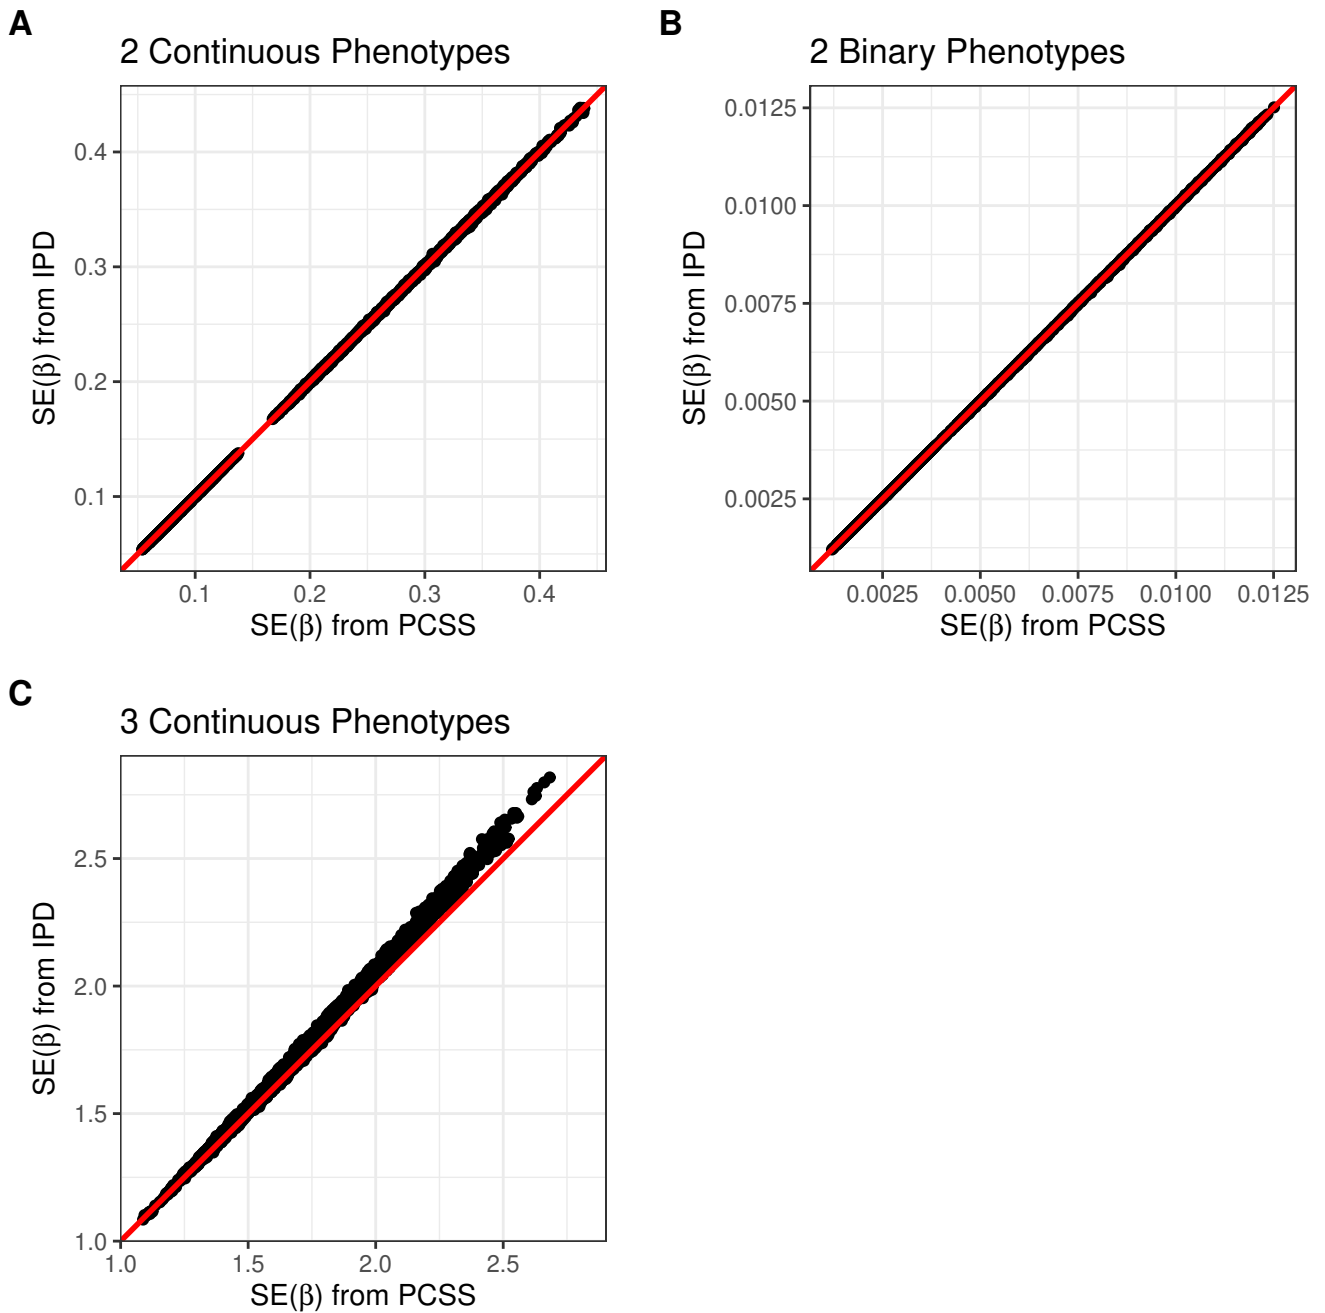

**Figure S2.** Comparison of slope coefficients' standard errors from a simulation study approximating a covariate adjusted linear model for a product of phenotypes using pre-computed summary statistics (PCSS) and individual participant data (IPD). **(A)** Modeling the product of two continuous phenotypes while adjusting for a binary and a continuous covariate. **(B)** Modeling the product of two binary phenotypes while adjusting for a binary and a continuous covariate. **(C)** Modeling the product of three continuous phenotypes while adjusting for a binary covariate.

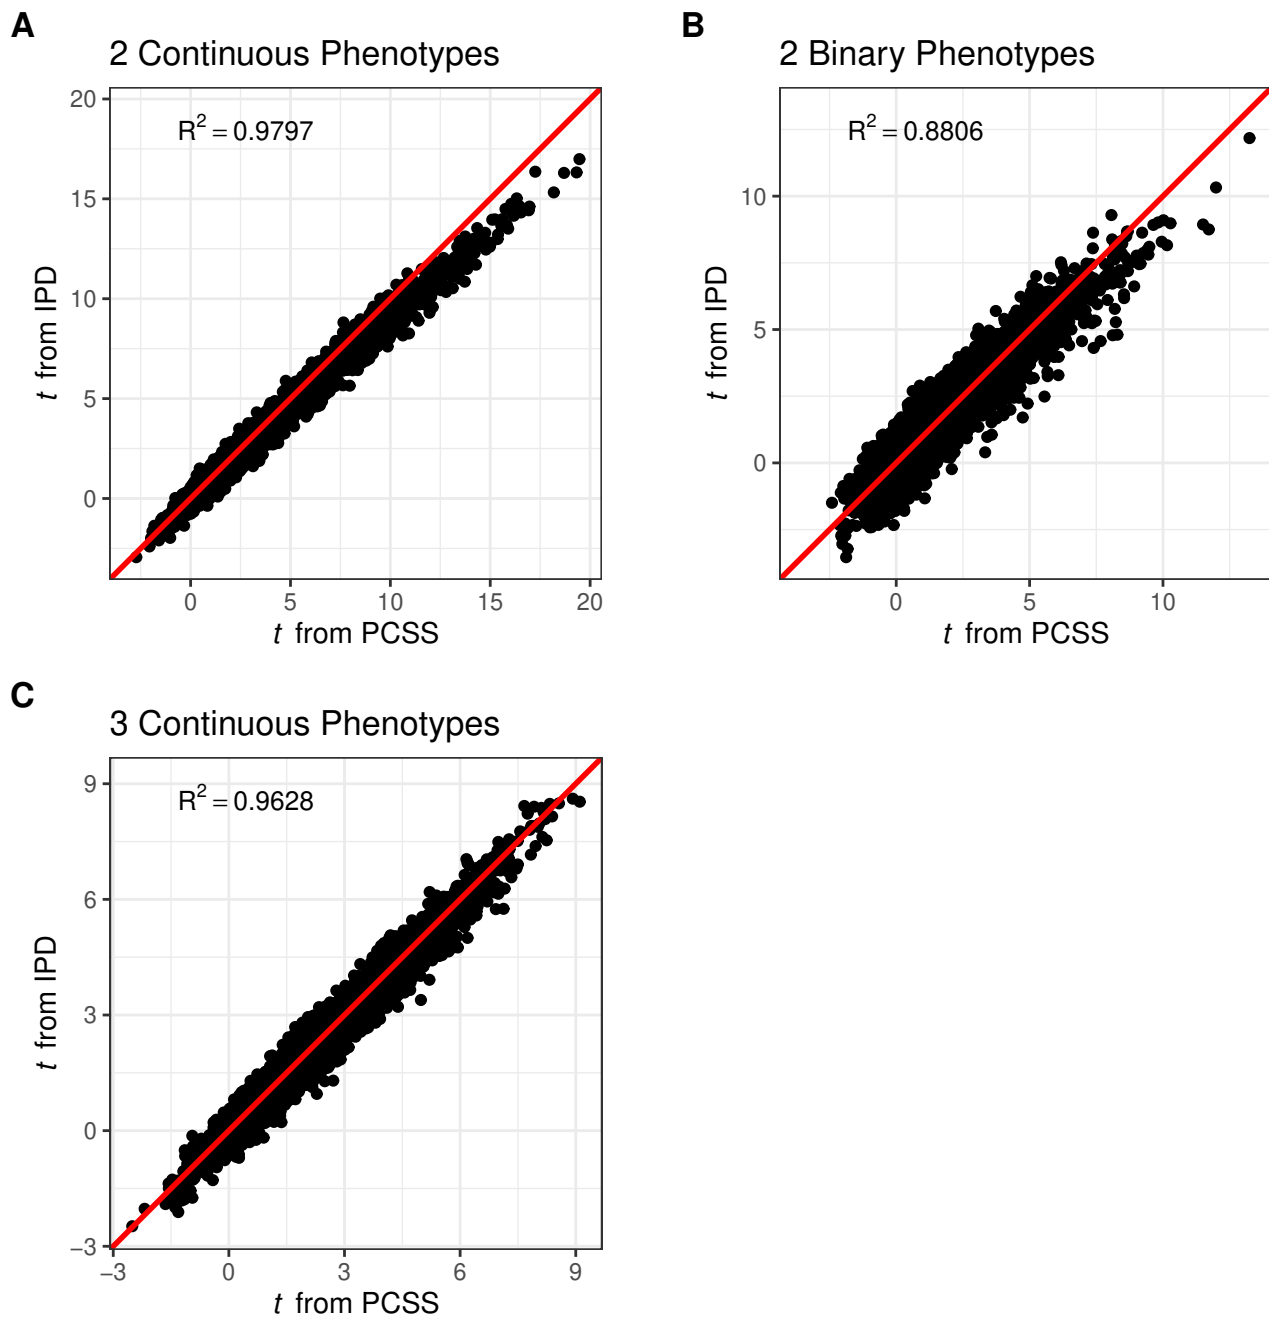

**Figure S3.** Comparison of  $t$  statistics from a simulation study approximating a covariate adjusted linear model for a product of phenotypes using pre-computed summary statistics (PCSS) and individual participant data (IPD). (A) Modeling the product of two continuous phenotypes while adjusting for a binary and a continuous covariate. (B) Modeling the product of two binary phenotypes while adjusting for a binary and a continuous covariate. (C) Modeling the product of three continuous phenotypes while adjusting for a binary covariate.

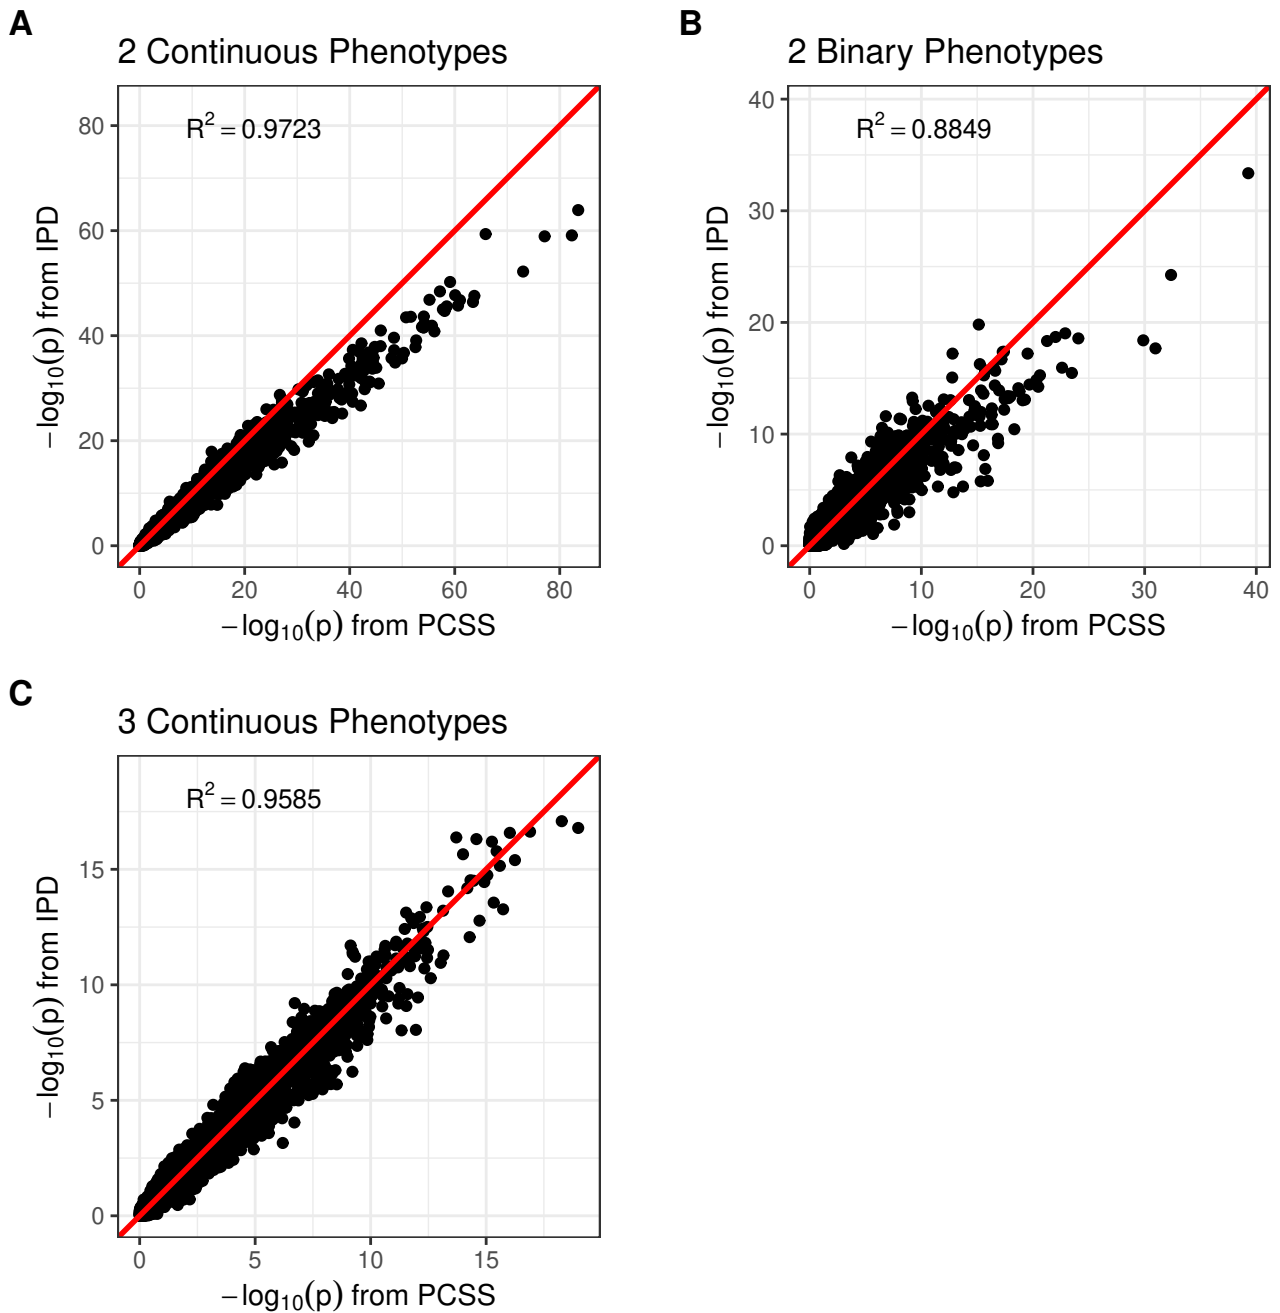

**Figure S4.** Comparison of  $p$ -values from a simulation study approximating a covariate adjusted linear model for a product of phenotypes using pre-computed summary statistics (PCSS) and individual participant data (IPD). Two-sided  $p$ -values were computed for the null hypothesis that the SNP had no linear effect on the phenotype product while adjusting for covariates. (A) Modeling the product of two continuous phenotypes while adjusting for a binary and a continuous covariate. (B) Modeling the product of two binary phenotypes while adjusting for a binary and a continuous covariate. (C) Modeling the product of three continuous phenotypes while adjusting for a binary covariate.

## 2 TABLES

**Table S1.** Distributions used to generate simulation parameters for the Type I error simulations. Continuous phenotypes were generated through a multivariate normal distribution while binary phenotypes were generated through a pair of correlated Bernoulli distributions. Correlations of two binary variables were simulated uniformly from the range of possible correlations for a given set of marginal probabilities  $\mu_1$  and  $\mu_2$  within the closed interval  $[-0.25, 0.95]$ .

|            | $n$          | MAF             | $\mu_k$        | $\sigma_k$    | $\rho_{kl}$               |
|------------|--------------|-----------------|----------------|---------------|---------------------------|
| Continuous | $10^4, 10^5$ | Unif(0.05, 0.4) | $N(0, 25)$     | Gamma(1, 1/2) | Unif(-0.5, 0.5)           |
| Binary     |              |                 | Unif(0.2, 0.8) | NA            | Unif( $f(\mu_1, \mu_2)$ ) |

**Table S2.** Simulation parameters for  $2^k$  factorial simulations. We carried out 1,000 simulations at each possible combination of settings for each set of phenotypes. Phenotype measures, or in the case of binary phenotypes logged odds of success, were simulated from a multivariate normal distribution conditional on variables  $x_1$ ,  $x_2$ , and, when we generated only 2 phenotypes,  $x_3$ . Parameters were selected such that the empirical power of models using individual participant data was around 90% under optimal settings. Columns with a value for Setting 1 but an “—” for Setting 2 indicate that the parameter was fixed at the value of Setting 1 in all simulations.

|                              |           | $n$    | MAF  | $\alpha_2$ | $\alpha_3$ | $\beta_{k0}$ | $\beta_{k1}$ | $\beta_{k2}$ | $\beta_{k3}$ | $\sigma_k^2$ | $\rho_{kl}$ |
|------------------------------|-----------|--------|------|------------|------------|--------------|--------------|--------------|--------------|--------------|-------------|
| 2 Continuous<br>( $k = 12$ ) | Setting 1 | $10^4$ | 0.10 | 0          | 0          | 5            | 0.01         | 0.1          | 0.1          | 2            | 0           |
|                              | Setting 2 | $10^5$ | 0.25 | $\ln 2$    | 0.4        | —            | 0.05         | 1            | 1            | 3            | 0.4         |
| 2 Binary<br>( $k = 14$ )     | Setting 1 | $10^4$ | 0.01 | 0          | 0          | 0            | $\ln 1.001$  | 0.01         | 0.01         | 1            | 0           |
|                              | Setting 2 | $10^5$ | 0.25 | $\ln 2$    | 0.4        | $\ln 1/4$    | $\ln 1.075$  | $\ln 2$      | $\ln 2$      | 5            | 0.4         |
| 3 Continuous<br>( $k = 13$ ) | Setting 1 | $10^4$ | 0.15 | 0          | NA         | 5            | 0.01         | 0.1          | NA           | 1.5          | 0           |
|                              | Setting 2 | —      | —    | $\ln 2$    | NA         | —            | 0.10         | 1            | NA           | 3            | 0.4         |

**Table S3.** Fatty acids in at least one analyzed ratio with abbreviations.

| Fatty Acid                 | Abbreviation | SHARE Variable Name |
|----------------------------|--------------|---------------------|
| Palmitic Acid              | PA           | RBC_C16_0           |
| Stearic Acid               | SA           | RBC_C18_0           |
| Palmitoleic Acid           | POA          | RBC_C16_1           |
| Oleic Acid                 | OA           | RBC_C18_1           |
| Eicosapentaenoic Acid      | EPA          | RBC_C20_5N3         |
| Docosapentaenoic Acid n-3  | DPA_N3       | RBC_C22_5N3         |
| Docosahexaenoic Acid       | DHA          | RBC_C22_6N3         |
| Linoleic Acid              | LA           | RBC_C18_2N6         |
| Gamma-linolenic Acid       | GLA          | RBC_C18_3N6         |
| Dihomo-gamma-linoleic Acid | DGLA         | RBC_C20_3N6         |
| Arachidonic Acid           | AA           | RBC_C20_4N6         |
| Docosapentaenoic Acid-n6   | DPA_N6       | RBC_C22_5N6         |
| Docosatetraenoic Acid      | DTA          | RBC_C22_4N6         |

**Table S4.** Simulation study assessing the affect of different case-control ratios on the performance of estimation of covariate adjusted linear models for the product of two binary phenotypes using pre-computed summary statistics. Covariate adjusted linear regression models were fit for either  $\mathbf{y}_1 \wedge \mathbf{y}_2$  or  $\mathbf{y}_1 \vee \mathbf{y}_2$  (respectively representing “and” and “or” statements). Data were generated via the model  $\text{logit}(\Pr(Y_{ik} = 1)) = \text{logit}(p_k) + \beta_{k1}(x_{i1} - \bar{x}_1)/s_{x_1} + \beta_{k2}x_{i2}$  for SNP  $x_{i1}$  with MAF 0.2 and standard normal covariate  $\mathbf{x}_2$  which was independent of  $\mathbf{x}_1$ . We fixed  $n = 5000$  and  $\beta_{k2} = \log(1.01)$  and let  $p_k \approx \Pr(Y_{ik} = 1)$  take on values 0.01, 0.05, 0.10, and let  $\beta_{k1}$  be either  $\log(1.01)$  or  $\log(1.10)$ . We carried out 1000 simulations for each combination of simulation parameters. Reported values are aggregated across all combinations of  $\beta_{11}$  and  $\beta_{21}$ .

| $p_1$                                                | $p_2$ | $\beta$  |           |          | SE( $\beta$ ) |          | $ t $     |          |
|------------------------------------------------------|-------|----------|-----------|----------|---------------|----------|-----------|----------|
|                                                      |       | IPD Mean | Bias      | MSE      | Bias          | MSE      | Bias      | MSE      |
| <b><math>\mathbf{y}_1 \wedge \mathbf{y}_2</math></b> |       |          |           |          |               |          |           |          |
| 0.01                                                 | 0.01  | 2.04E-05 | -1.60E-06 | 6.62E-08 | 8.09E-08      | 1.47E-14 | -7.70E-01 | 8.69E-01 |
| 0.01                                                 | 0.05  | 9.81E-05 | -1.64E-06 | 3.27E-07 | 1.12E-07      | 3.03E-14 | -6.15E-01 | 7.56E-01 |
| 0.01                                                 | 0.10  | 1.94E-04 | 3.82E-06  | 6.10E-07 | 1.44E-07      | 5.30E-14 | -4.83E-01 | 6.76E-01 |
| 0.05                                                 | 0.01  | 9.82E-05 | 7.29E-06  | 3.06E-07 | 1.06E-07      | 2.75E-14 | -5.94E-01 | 7.28E-01 |
| 0.05                                                 | 0.05  | 4.72E-04 | 2.80E-05  | 1.58E-06 | 2.34E-07      | 1.45E-13 | -4.51E-01 | 6.97E-01 |
| 0.05                                                 | 0.10  | 9.26E-04 | -4.32E-05 | 2.87E-06 | 3.17E-07      | 2.97E-13 | -3.67E-01 | 6.60E-01 |
| 0.10                                                 | 0.01  | 1.93E-04 | -1.90E-05 | 6.30E-07 | 1.52E-07      | 5.97E-14 | -5.15E-01 | 7.23E-01 |
| 0.10                                                 | 0.05  | 9.12E-04 | -1.97E-05 | 2.95E-06 | 3.23E-07      | 3.01E-13 | -3.79E-01 | 6.84E-01 |
| 0.10                                                 | 0.10  | 1.78E-03 | -1.86E-05 | 5.55E-06 | 4.22E-07      | 6.65E-13 | -2.73E-01 | 6.52E-01 |
| <b><math>\mathbf{y}_1 \vee \mathbf{y}_2</math></b>   |       |          |           |          |               |          |           |          |
| 0.01                                                 | 0.01  | 1.97E-03 | 2.36E-06  | 6.85E-08 | 4.95E-09      | 8.44E-15 | -2.63E-03 | 5.45E-03 |
| 0.01                                                 | 0.05  | 5.47E-03 | 4.93E-06  | 3.31E-07 | 1.06E-08      | 4.92E-14 | -1.92E-03 | 9.25E-03 |
| 0.01                                                 | 0.10  | 9.36E-03 | -5.19E-06 | 6.43E-07 | 1.16E-08      | 1.17E-13 | -2.43E-03 | 1.04E-02 |
| 0.05                                                 | 0.01  | 5.55E-03 | 9.83E-06  | 3.33E-07 | 5.47E-09      | 4.83E-14 | 2.38E-05  | 9.34E-03 |
| 0.05                                                 | 0.05  | 8.99E-03 | 1.32E-05  | 1.61E-06 | 3.41E-08      | 2.78E-13 | 2.82E-04  | 2.83E-02 |
| 0.05                                                 | 0.10  | 1.24E-02 | 3.24E-05  | 2.89E-06 | 5.98E-08      | 5.87E-13 | -3.57E-03 | 3.65E-02 |
| 0.10                                                 | 0.01  | 9.52E-03 | -5.62E-06 | 6.31E-07 | 1.33E-08      | 1.20E-13 | -1.45E-03 | 1.02E-02 |
| 0.10                                                 | 0.05  | 1.24E-02 | 2.59E-05  | 3.03E-06 | 4.95E-08      | 6.21E-13 | -3.36E-03 | 3.81E-02 |
| 0.10                                                 | 0.10  | 1.57E-02 | 4.83E-05  | 5.80E-06 | 8.52E-08      | 1.31E-12 | -3.43E-03 | 5.85E-02 |
